# Supplementary material for: Efficient simulation of stochastic chemical kinetics with the Stochastic Bulirsch-Stoer extrapolation method
Source: Springer Nature journal article supplement (doi:10.1186/1752-0509-8-71), 2014-06-18
Supplement: 12918_2013_1338_MOESM1_ESM.pdf [file 12918_2013_1338_MOESM1_ESM.pdf]

# Efficient simulation of stochastic chemical kinetics with the Stochastic Bulirsch-Stoer extrapolation method: Supplementary information

Tamás Székely Jr.\*<sup>1</sup> , Kevin Burrage<sup>1,2</sup> , Konstantinos C. Zygalakis<sup>3</sup> , Manuel Barrio\*<sup>4</sup>

<sup>1</sup>Department of Computer Science, University of Oxford, Oxford, OX1 3QD, United Kingdom

<sup>2</sup>Department of Mathematics, Queensland University of Technology, Brisbane, Qld 4001, Australia

<sup>3</sup>Mathematics, University of Southampton, Southampton, SO17 1BJ, United Kingdom

<sup>4</sup>Departamento de Informática, Universidad de Valladolid, 47011 Valladolid, Spain

Email: Tamás Székely Jr.\*- [tamas.szekely@cs.ox.ac.uk](mailto:tamas.szekely@cs.ox.ac.uk); Kevin Burrage - [kevin.burrage@cs.ox.ac.uk](mailto:kevin.burrage@cs.ox.ac.uk); Konstantinos C. Zygalakis - [k.zygalakis@soton.ac.uk](mailto:k.zygalakis@soton.ac.uk); Manuel Barrio\*- [mbarrio@infor.uva.es](mailto:mbarrio@infor.uva.es);

\*Corresponding author

In this file we show the plots for error versus runtime for all the species of the chain decay, Michaelis-Menten, Schlögl and mutually inhibiting enzymes systems.

**Chain decay system**

Fig. A1 shows histogram errors for all species from  $5 \times 10^5$  SBS, SBS-DA, TL, TTTL and UBTL simulations. The SBS safety factors are  $S_1 = 0.2, S_2 = 0.4$ , those for the SBS-DA are  $S_1 = 0.15, S_2 = 0.2, a_{tol} = 10^{-6}$ , and error parameters corresponding to each point (going left to right) are listed in Table 3 of the article. TTTL parameter  $\theta = 0.55$ .

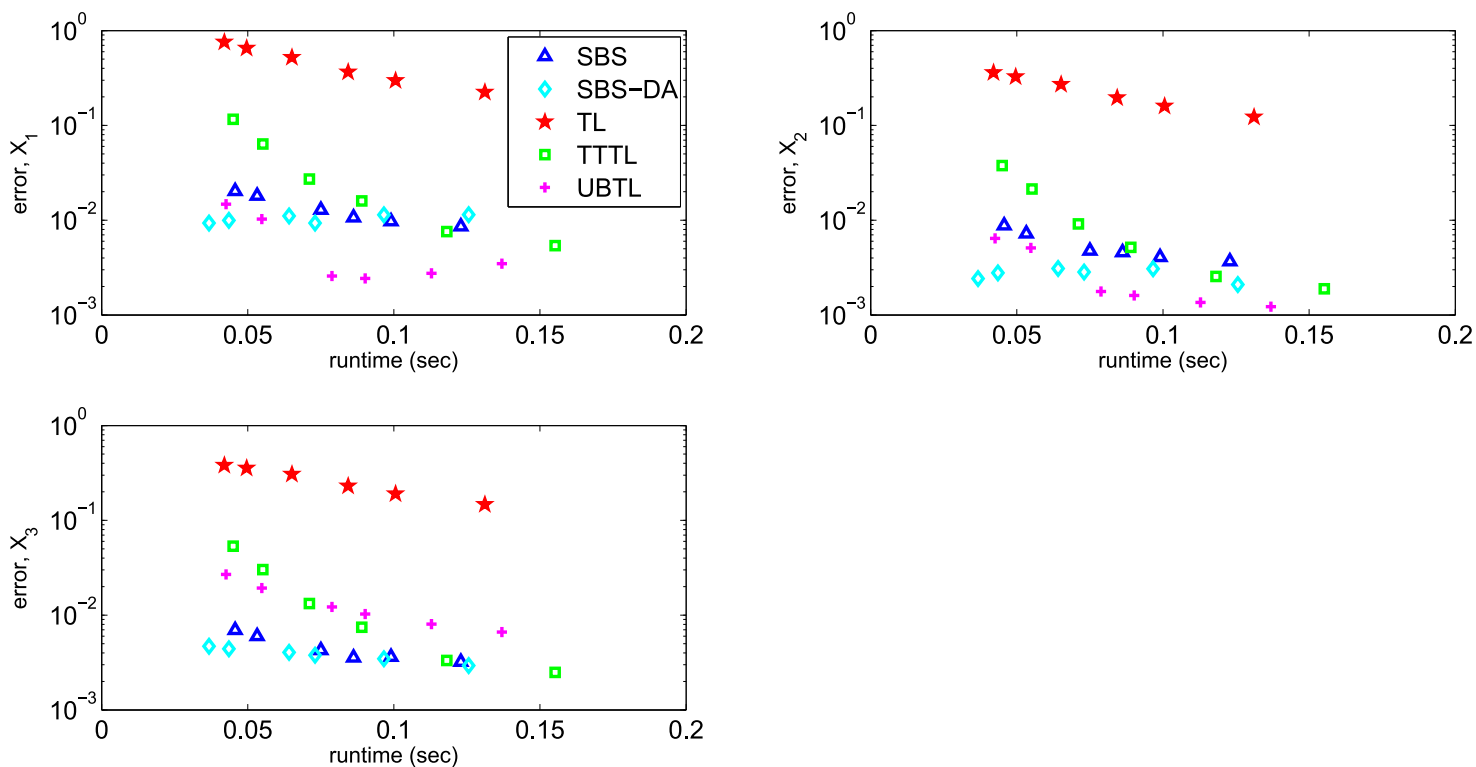

Figure A1: **Chain decay system efficiency for all species and all methods.** Histogram errors of all three species versus time for a single simulation.

*Michaelis-Menten system*

Fig. A2 shows histogram errors for all species from  $10^6$  SBS, SBS-DA, TL, TTTL and UBTL simulations. The SBS safety factors are  $S_1 = S_2 = 0.35$ , and those of the SBS-DA are  $S_1 = S_2 = 0.33$ ,  $a_{tol} = 10^{-6}$ , and error parameters corresponding to each point (going left to right) are listed in Table 3 of the article. TTTL parameter  $\theta = 0.55$ .

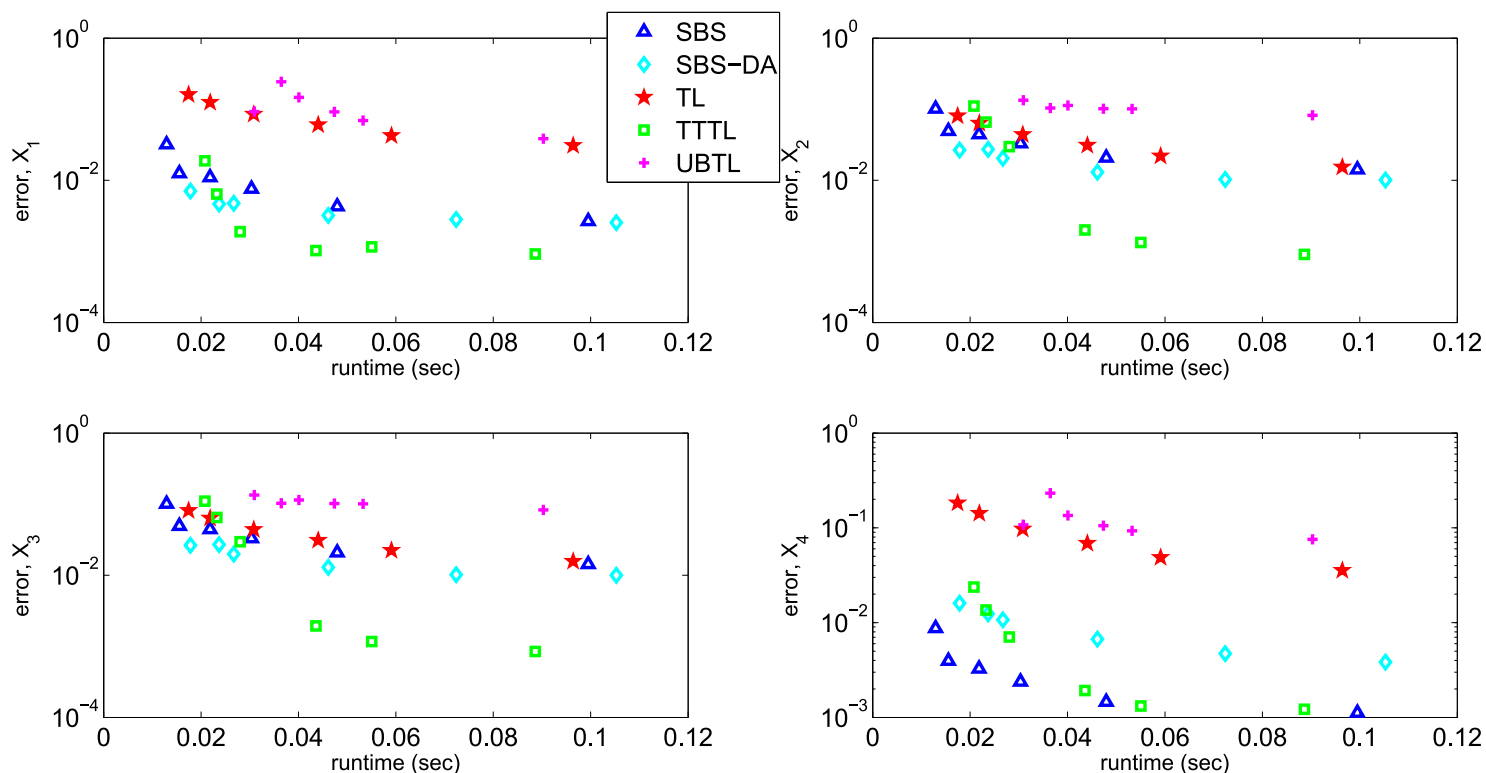

Figure A2: **Michaelis-Menten system efficiency for all species and all methods.** Histogram errors of all four species versus time for a single simulation.

*Schlögl system*

Fig. A3 shows histogram errors for all species from  $2 \times 10^5$  SBS, SBS-DA, TL, TTTL and UBTL simulations. The SBS safety factors are  $S_1 = S_2 = 0.05$ , those for the SBS-DA are  $S_1 = S_2 = 0.125$ ,  $a_{tol} = 10^{-6}$ , and error parameters corresponding to each point (going left to right) are listed in Table 3 of the article. TTTL parameter  $\theta = 0.55$ .

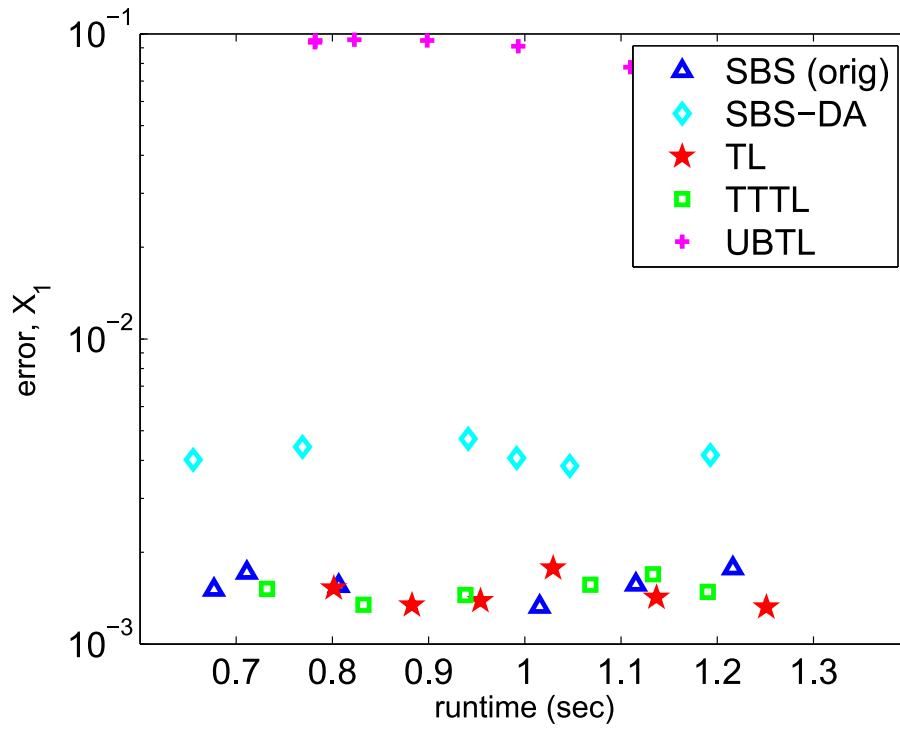

Figure A3: **Schlögl system efficiency for the only species and all methods.** Histogram errors of all four species versus time for a single simulation.

***Mutually inhibiting enzymes system***

Fig. A4 shows histogram errors for all species from  $2 \times 10^5$  SBS, TL, TTTL and UBTL simulations. The SBS safety factors are  $S_1 = S_2 = 0.4$  and  $S_1 = 0.55, S_2 = 0.7$  for the SBS-DA, with  $a_{tol} = 10^{-6}$ , and error parameters corresponding to each point (going left to right) are listed in Table 3 of the main text. TTTL parameter  $\theta = 0.55$ .

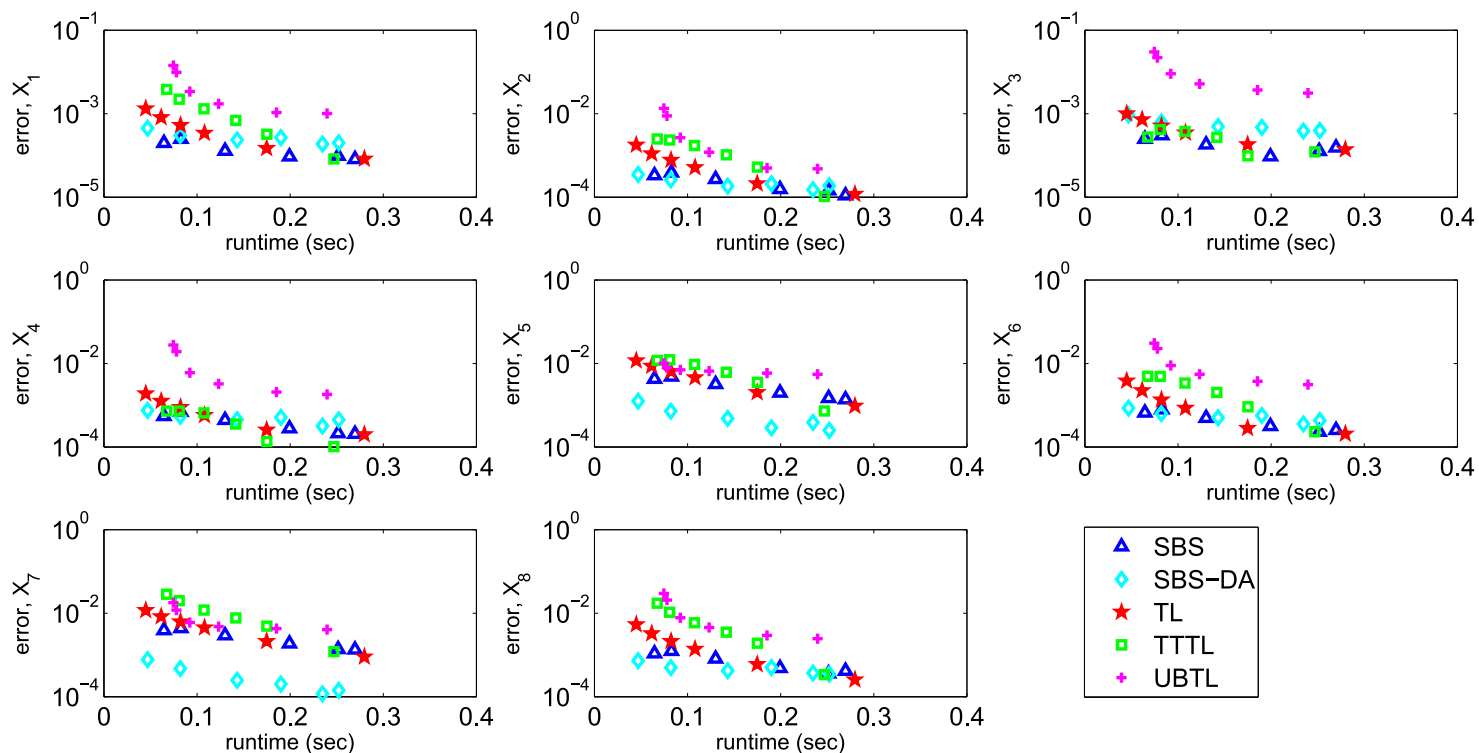

Figure A4: **Mutually inhibiting enzymes system efficiency for all species and all methods.** Histogram errors of all eight species versus time for a single simulation.
