# Supplementary material for: Efficient simulation of stochastic chemical kinetics with the Stochastic Bulirsch-Stoer extrapolation method
Source: Springer Nature journal article supplement (doi:10.1186/1752-0509-8-71), 2014-06-18

**(a)**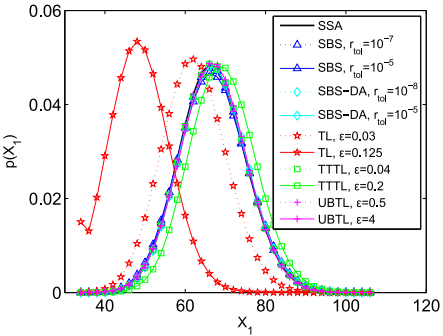**(b)**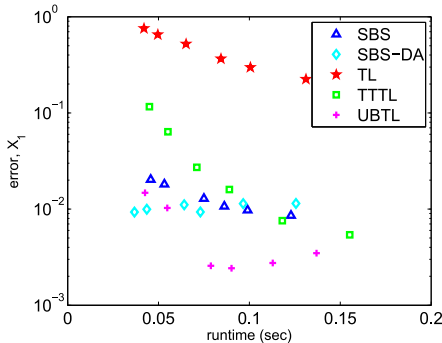

Supplement: 12918_2013_1338_MOESM3_ESM.pdf [file 12918_2013_1338_MOESM3_ESM.pdf]
